# Supplementary material
Source: PubMed Central journal article supplement (PMC6283057)
Supplement: NIHMS1508399-supplement-Sequence_Center_by_Study_Legend.pdf [file NIHMS1508399-supplement-Sequence_Center_by_Study_Legend.pdf]

## Sequence Center by Study Legend

- BROAD:EOMI
- BROAD:HeartGo
- BROAD:WHISP
- cases:UW
- Nick:HeartGo
- Nick:LungGo
- Nick:WHISP
- cases:WHI
