# Supplementary material
Source: PubMed Central journal article supplement (PMC6283057)

**Distribution of Number of controls with PDV per gene**

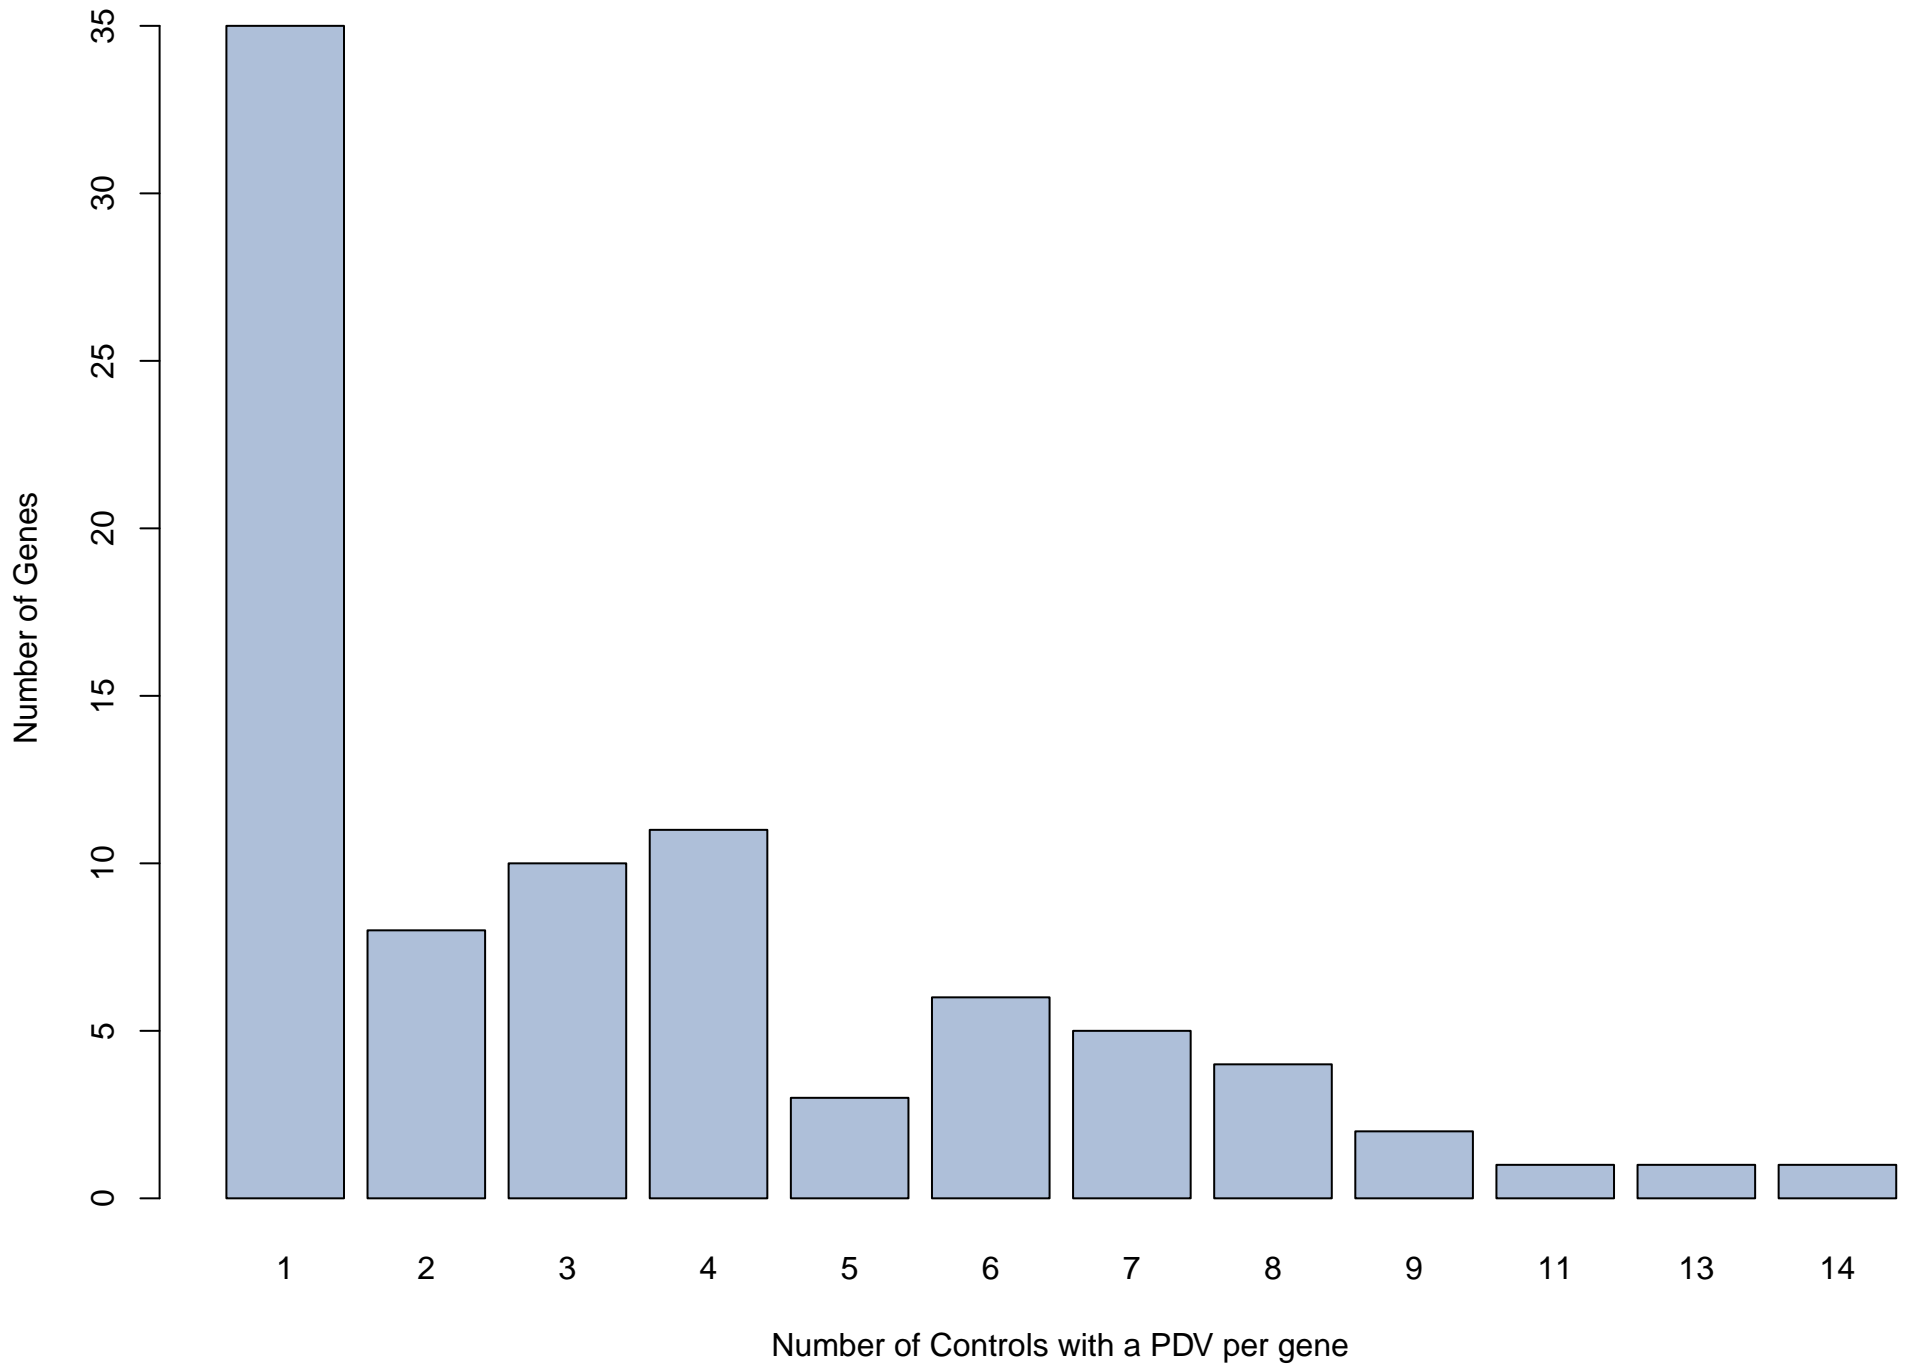

Supplement: NIHMS1508399-supplement-Supp_Fig_1.pdf [file NIHMS1508399-supplement-Supp_Fig_1.pdf]

### Sequence Center

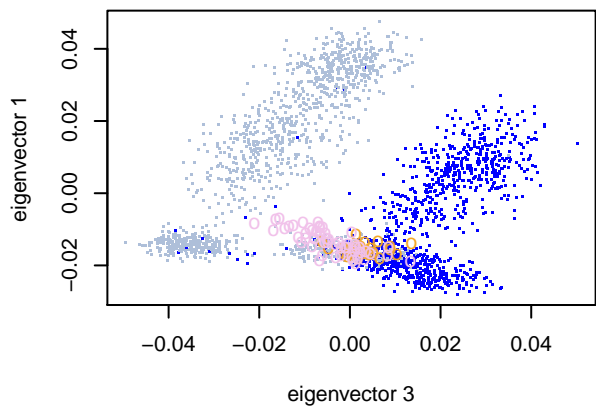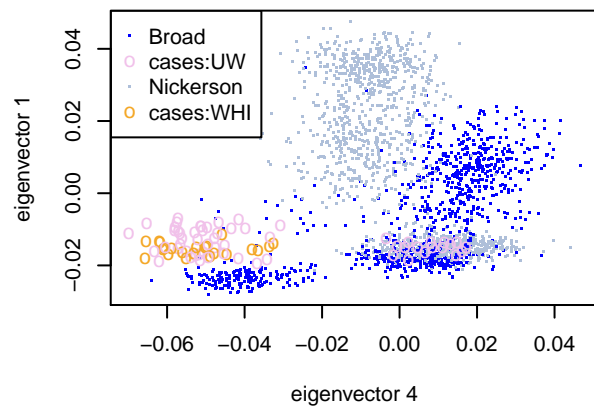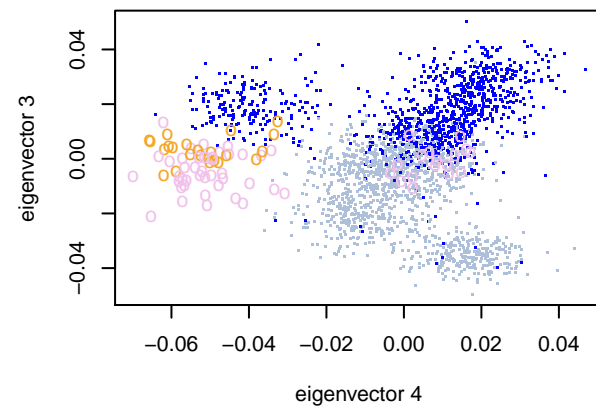

### Target

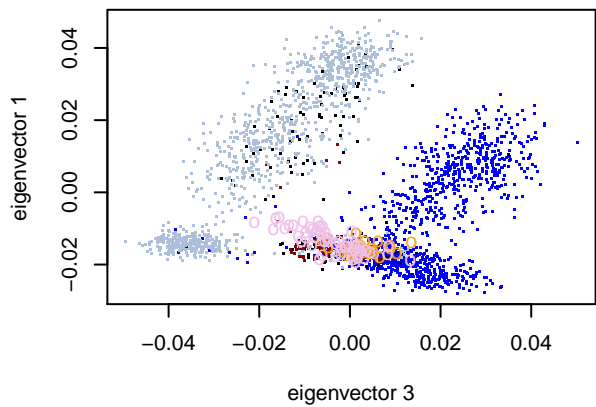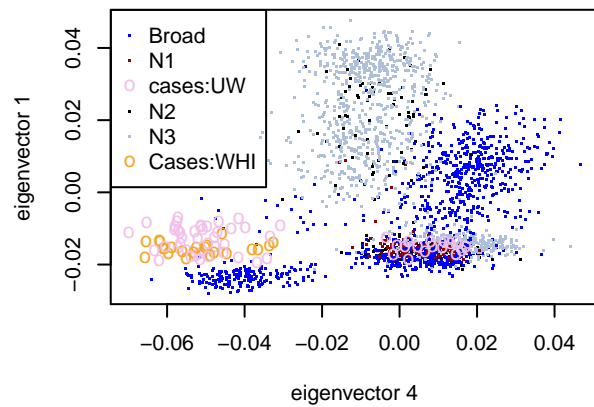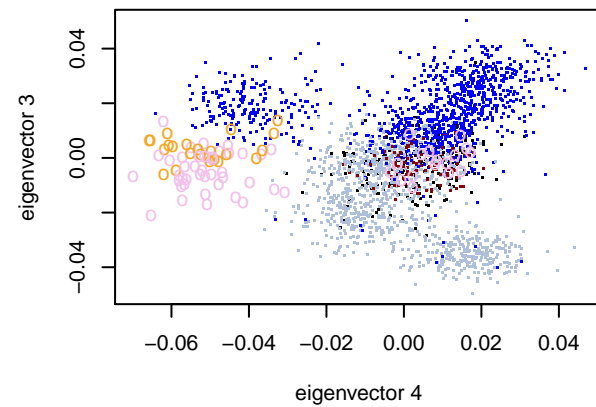

### Sequence Center by Study

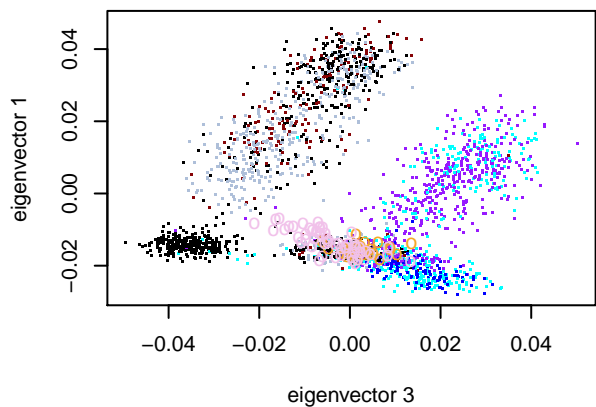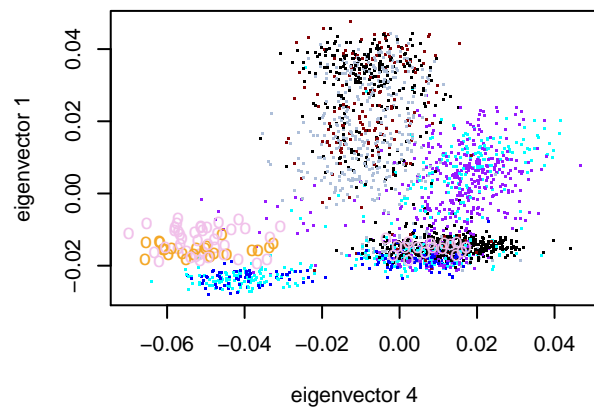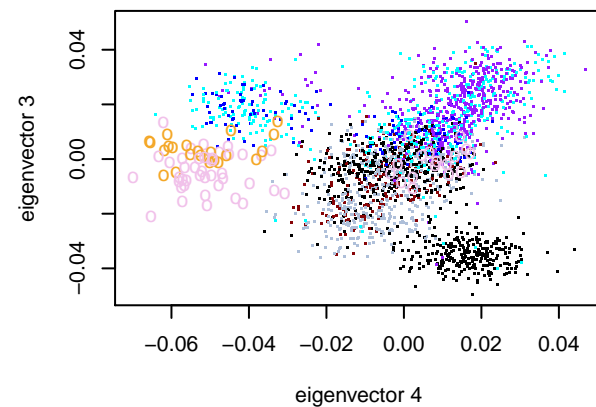

Supplement: NIHMS1508399-supplement-Supp_Fig_2.pdf [file NIHMS1508399-supplement-Supp_Fig_2.pdf]
